# Supplementary material
Source: PubMed Central journal article supplement (PMC337042)
Supplement: pnas_0308084100_1.pdf [file pnas_0308084100_1.pdf]

**Table 1.** Supporting data for Fig. 7.

| From [>] in kb | to [=] in kb | LEN1[bp]  | LEN2[bp] | LEN2/LEN1 |
|----------------|--------------|-----------|----------|-----------|
| 0              | 1            | 122343582 | 1586272  | 0.01      |
| 1              | 2            | 491140983 | 6246811  | 0.01      |
| 2              | 3            | 613185069 | 8862917  | 0.01      |
| 3              | 4            | 398389963 | 8125876  | 0.02      |
| 4              | 5            | 242293777 | 7143015  | 0.03      |
| 5              | 6            | 168115047 | 5621708  | 0.03      |
| 6              | 7            | 133364657 | 4193234  | 0.03      |
| 7              | 8            | 107820127 | 4191517  | 0.04      |
| 8              | 9            | 87311584  | 4217355  | 0.05      |
| 9              | 10           | 72799734  | 3756439  | 0.05      |
| 10             | 11           | 65844643  | 2890151  | 0.04      |
| 11             | 12           | 55118499  | 2565769  | 0.05      |
| 12             | 13           | 50583843  | 2639139  | 0.05      |
| 13             | 14           | 44034127  | 2950000  | 0.07      |
| 14             | 15           | 36769912  | 1779472  | 0.05      |
| 15             | 16           | 28933679  | 1294835  | 0.04      |
| 16             | 17           | 25743153  | 1200000  | 0.05      |
| 17             | 18           | 21093985  | 1095989  | 0.05      |
| 18             | 19           | 17299059  | 1699059  | 0.10      |
| 19             | 20           | 13950000  | 750000   | 0.05      |
| 20             | 21           | 11543206  | 645000   | 0.06      |
| 21             | 22           | 9300000   | 450000   | 0.05      |
| 22             | 23           | 6249999   | 599999   | 0.10      |
| 23             | 24           | 4850000   | 450000   | 0.09      |
| 24             | 25           | 2800000   | 300000   | 0.11      |
