# Supplementary material
Source: PubMed Central journal article supplement (PMC337042)
Supplement: pnas_0308084100_2.pdf [file pnas_0308084100_2.pdf]

**Table 2.** Modified data for Fig. 7 without sex chromosomes and chromosome 7.

| From [ $>$ ] in kb | to [=] in kb | LEN1[bp]  | LEN2[bp] | LEN2/LEN1 |
|--------------------|--------------|-----------|----------|-----------|
| 0                  | 1            | 96064187  | 736272   | 0.01      |
| 1                  | 2            | 424098111 | 3534106  | 0.01      |
| 2                  | 3            | 545929912 | 6136917  | 0.01      |
| 3                  | 4            | 355393044 | 5125876  | 0.01      |
| 4                  | 5            | 215282853 | 4742279  | 0.02      |
| 5                  | 6            | 151651121 | 4548507  | 0.03      |
| 6                  | 7            | 120401738 | 3680315  | 0.03      |
| 7                  | 8            | 98982605  | 3591517  | 0.04      |
| 8                  | 9            | 79714458  | 3670229  | 0.05      |
| 9                  | 10           | 66054433  | 2961138  | 0.04      |
| 10                 | 11           | 59464970  | 2410478  | 0.04      |
| 11                 | 12           | 49295825  | 1787956  | 0.04      |
| 12                 | 13           | 46183843  | 2139139  | 0.05      |
| 13                 | 14           | 39684127  | 1650000  | 0.04      |
| 14                 | 15           | 32940440  | 1200000  | 0.04      |
| 15                 | 16           | 25933679  | 694835   | 0.03      |
| 16                 | 17           | 23393153  | 850000   | 0.04      |
| 17                 | 18           | 19093985  | 795989   | 0.04      |
| 18                 | 19           | 14799059  | 799059   | 0.05      |
| 19                 | 20           | 11900000  | 450000   | 0.04      |
| 20                 | 21           | 9893206   | 295000   | 0.03      |
| 21                 | 22           | 8050000   | 250000   | 0.03      |
| 22                 | 23           | 5099999   | 249999   | 0.05      |
| 23                 | 24           | 3900000   | 200000   | 0.05      |
| 24                 | 25           | 2400000   | 200000   | 0.08      |
