# Supplementary material
Source: PubMed Central journal article supplement (PMC337042)
Supplement: pnas_0308084100_3.pdf [file pnas_0308084100_3.pdf]

**Table 3.** Original supporting data for Fig. 4.

| Chromosome | Similarity | No. Alus |       | 50-k intervals |       | No. Alus |       | 50-k intervals |         | Alu densities |         |       |
|------------|------------|----------|-------|----------------|-------|----------|-------|----------------|---------|---------------|---------|-------|
|            |            | x<0.41   |       |                |       | x>=0.41  |       |                |         | x<0.41        | x>=0.41 | Total |
| Autosomes  | 100        | 1142     | 25459 | 507            | 14938 | 1649     | 40397 | 0.04           | 0.03    | 0.04          |         |       |
|            | 99         | 3151     | 25459 | 1467           | 14938 | 4618     | 40397 | 0.12           | 0.1     | 0.11          |         |       |
|            | 98         | 3830     | 25459 | 1821           | 14938 | 5651     | 40397 | 0.15           | 0.12    | 0.14          |         |       |
|            | 97         | 4302     | 25459 | 2269           | 14938 | 6571     | 40397 | 0.17           | 0.15    | 0.16          |         |       |
|            | 96         | 5939     | 25459 | 4052           | 14938 | 9991     | 40397 | 0.23           | 0.27    | 0.25          |         |       |
|            | 95         | 9633     | 25459 | 8149           | 14938 | 17782    | 40397 | 0.38           | 0.55    | 0.44          |         |       |
|            | 94         | 16151    | 25459 | 15382          | 14938 | 31533    | 40397 | 0.63           | 1.03    | 0.78          |         |       |
|            | 93         | 24175    | 25459 | 24077          | 14938 | 48252    | 40397 | 0.95           | 1.61    | 1.19          |         |       |
|            | 92         | 30605    | 25459 | 30343          | 14938 | 60948    | 40397 | 1.2            | 2.03    | 1.51          |         |       |
|            | 91         | 35616    | 25459 | 34833          | 14938 | 70449    | 40397 | 1.4            | 2.33    | 1.74          |         |       |
|            | 90         | 39244    | 25459 | 37709          | 14938 | 76953    | 40397 | 1.54           | 2.52    | 1.9           |         |       |
|            | SIM        | x<0.41   |       | x>=0.41        |       | Total    | Total | x<0.41         | x>=0.41 | Total         |         |       |
| Chr. X     | 100        | 54       | 1716  | 9              | 415   | 63       | 2131  | 0.03           | 0.02    | 0.03          |         |       |
|            | 99         | 153      | 1716  | 28             | 415   | 181      | 2131  | 0.09           | 0.07    | 0.08          |         |       |
|            | 98         | 184      | 1716  | 42             | 415   | 226      | 2131  | 0.11           | 0.1     | 0.11          |         |       |
|            | 97         | 225      | 1716  | 67             | 415   | 292      | 2131  | 0.13           | 0.16    | 0.14          |         |       |
|            | 96         | 357      | 1716  | 122            | 415   | 479      | 2131  | 0.21           | 0.29    | 0.22          |         |       |
|            | 95         | 616      | 1716  | 264            | 415   | 880      | 2131  | 0.36           | 0.64    | 0.41          |         |       |
|            | 94         | 1015     | 1716  | 472            | 415   | 1487     | 2131  | 0.59           | 1.14    | 0.7           |         |       |
|            | 93         | 1393     | 1716  | 687            | 415   | 2080     | 2131  | 0.81           | 1.66    | 0.98          |         |       |
|            | 92         | 1702     | 1716  | 826            | 415   | 2528     | 2131  | 0.99           | 1.99    | 1.19          |         |       |
|            | 91         | 1883     | 1716  | 921            | 415   | 2804     | 2131  | 1.1            | 2.22    | 1.32          |         |       |
|            | 90         | 2038     | 1716  | 972            | 415   | 3010     | 2131  | 1.19           | 2.34    | 1.41          |         |       |
|            | SIM        | x<0.41   |       | x>=0.41        |       | Total    | Total | x<0.41         | x>=0.41 | Total         |         |       |
| Chr. Y     | 100        | 14       | 186   | 2              | 26    | 16       | 212   | 0.08           | 0.08    | 0.08          |         |       |
|            | 99         | 34       | 186   | 6              | 26    | 40       | 212   | 0.18           | 0.23    | 0.19          |         |       |
|            | 98         | 46       | 186   | 6              | 26    | 52       | 212   | 0.25           | 0.23    | 0.25          |         |       |
|            | 97         | 50       | 186   | 8              | 26    | 58       | 212   | 0.27           | 0.31    | 0.27          |         |       |
|            | 96         | 53       | 186   | 8              | 26    | 61       | 212   | 0.28           | 0.31    | 0.29          |         |       |
|            | 95         | 66       | 186   | 9              | 26    | 75       | 212   | 0.35           | 0.35    | 0.35          |         |       |
|            | 94         | 83       | 186   | 10             | 26    | 93       | 212   | 0.45           | 0.38    | 0.44          |         |       |
|            | 93         | 114      | 186   | 11             | 26    | 125      | 212   | 0.61           | 0.42    | 0.59          |         |       |
|            | 92         | 144      | 186   | 17             | 26    | 161      | 212   | 0.77           | 0.65    | 0.76          |         |       |
|            | 91         | 169      | 186   | 24             | 26    | 193      | 212   | 0.91           | 0.92    | 0.91          |         |       |
|            | 90         | 217      | 186   | 31             | 26    | 248      | 212   | 1.17           | 1.19    | 1.17          |         |       |

| Sim. to cons | Ratios of Alu densities for different chromosomes* |      |      |         |      |      |       |      |      |
|--------------|----------------------------------------------------|------|------|---------|------|------|-------|------|------|
|              | x<0.41                                             |      |      | x>=0.41 |      |      | Total |      |      |
|              | X/A                                                | Y/A  | Y/X  | X/A     | Y/A  | Y/X  | X/A   | Y/A  | Y/X  |
| 100          | 0.7                                                | 1.68 | 2.39 | 0.64    | 2.27 | 3.55 | 0.72  | 1.85 | 2.55 |
| 99           | 0.72                                               | 1.48 | 2.05 | 0.69    | 2.35 | 3.42 | 0.74  | 1.65 | 2.22 |
| 98           | 0.71                                               | 1.64 | 2.31 | 0.83    | 1.89 | 2.28 | 0.76  | 1.75 | 2.31 |
| 97           | 0.78                                               | 1.59 | 2.05 | 1.06    | 2.03 | 1.91 | 0.84  | 1.68 | 2    |
| 96           | 0.89                                               | 1.22 | 1.37 | 1.08    | 1.13 | 1.05 | 0.91  | 1.16 | 1.28 |
| 95           | 0.95                                               | 0.94 | 0.99 | 1.17    | 0.63 | 0.54 | 0.94  | 0.8  | 0.86 |
| 94           | 0.93                                               | 0.7  | 0.75 | 1.1     | 0.37 | 0.34 | 0.89  | 0.56 | 0.63 |
| 93           | 0.85                                               | 0.65 | 0.76 | 1.03    | 0.26 | 0.26 | 0.82  | 0.49 | 0.6  |
| 92           | 0.83                                               | 0.64 | 0.78 | 0.98    | 0.32 | 0.33 | 0.79  | 0.5  | 0.64 |
| 91           | 0.78                                               | 0.65 | 0.83 | 0.95    | 0.4  | 0.42 | 0.75  | 0.52 | 0.69 |
| 90           | 0.77                                               | 0.76 | 0.98 | 0.93    | 0.47 | 0.51 | 0.74  | 0.61 | 0.83 |

Alu elements in segmental duplications were excluded from the analysis.  
X, Y and A denote chromosomes X and Y and autosomes, respectively.

\* Based on the last three columns of the original table above.
