# Supplementary material
Source: PubMed Central journal article supplement (PMC337042)

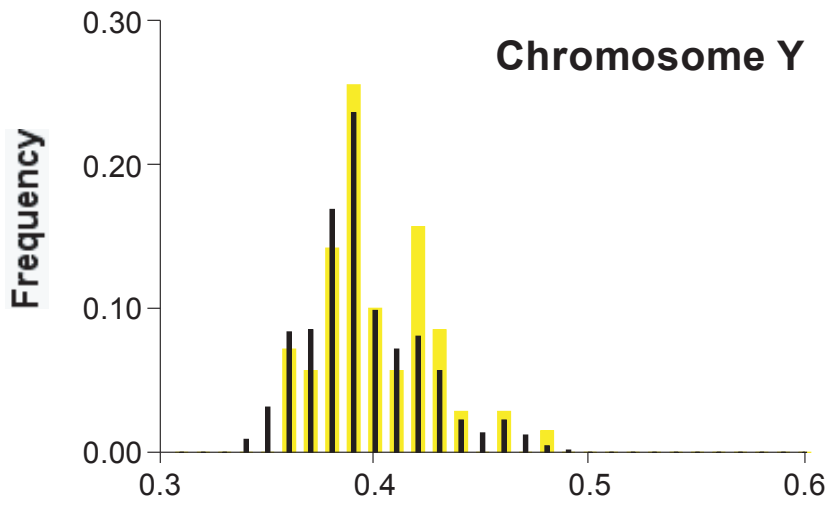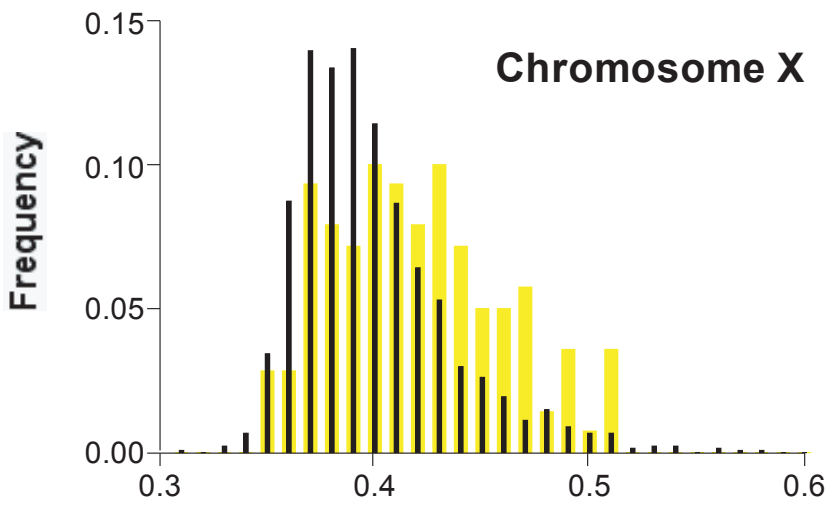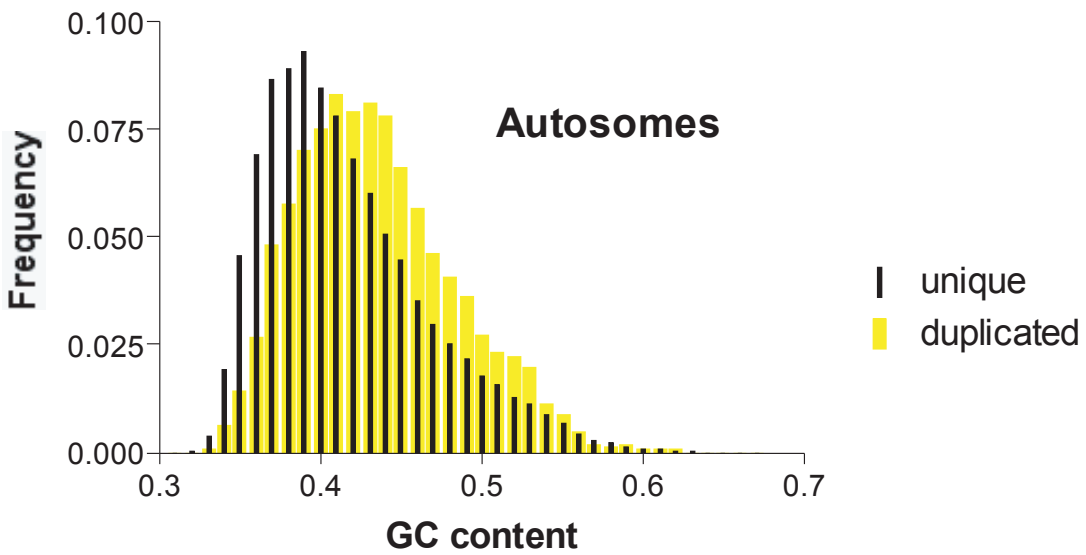

Supplement: pnas_0308084100_5.pdf [file pnas_0308084100_5.pdf]

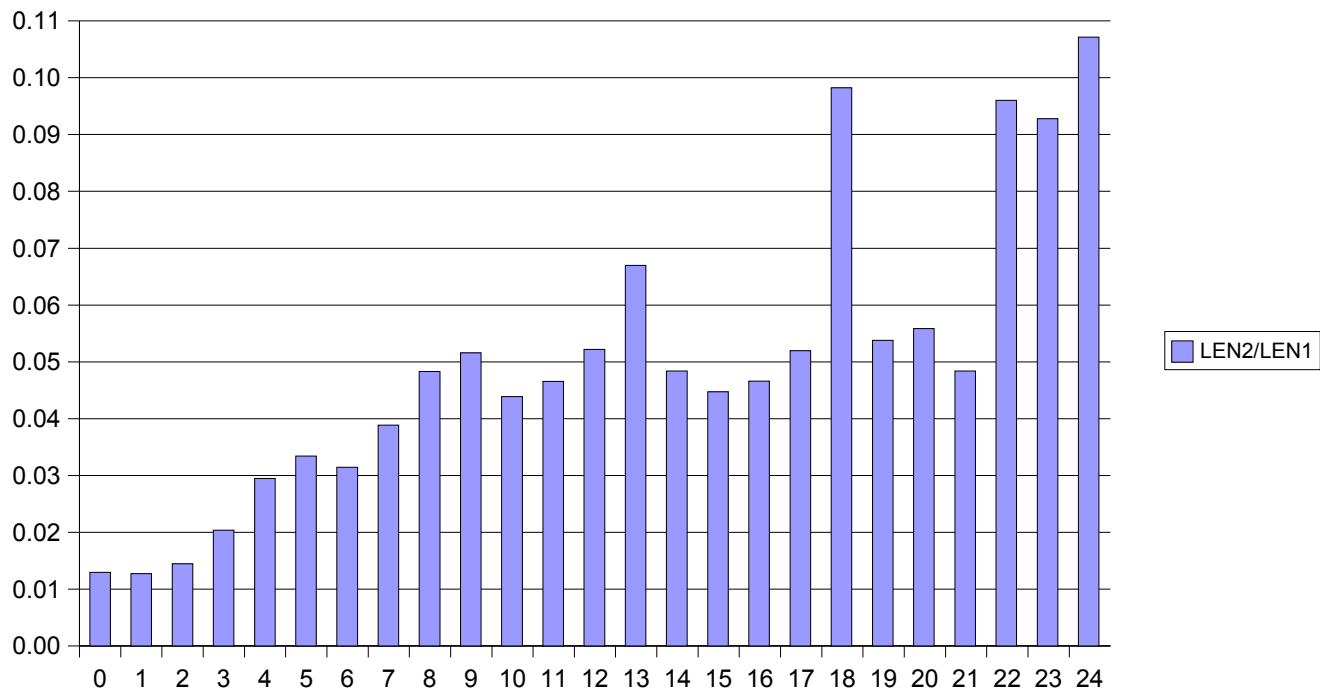

Supplement: pnas_0308084100_7.pdf [file pnas_0308084100_7.pdf]

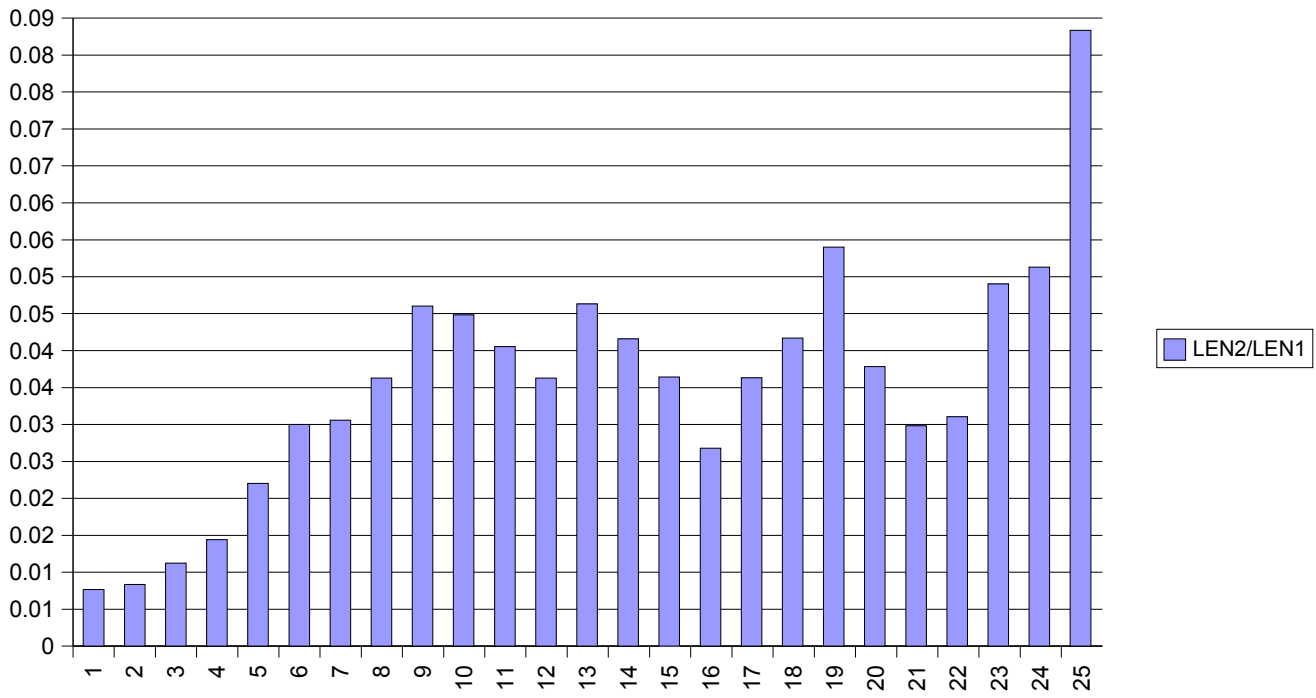

Supplement: pnas_0308084100_9.pdf [file pnas_0308084100_9.pdf]
